# Supplementary material for: ATAT 1.0, an Automated Timing Accordance Tool for comparing ice-sheet model output with geochronological data
Source: Copernicus journal article supplement (doi:10.5194/gmd-2018-12), 2018-02-14
Supplement: Supplementary file [file gmd-2018-12-RC2-supplement.pdf]

After a long description of data and model uncertainties, the authors present a description and example application of a data-model comparison software tool. As detailed below, I find several flaws in the proposed data-model comparison algorithm that need to be addressed. Furthermore, I do not understand why the authors place so much attention on model uncertainty in the text and then fully ignore it in the design of their metrics. If this tool is meant to be used by those doing model calibration against paleo observations, then model uncertainty and downscaling error needs to be explicitly accounted for in the metric. A few of my issues can be addressed by making the package more flexible to handle user choices of metrics (eg implemented by documentation of how to change the metric).

# major comments

# I also agree with Evan Gowan's suggestion to significantly shorten  
# the model uncertainty section. When I first read the paper, I  
# expected all the detailed uncertainty discussion to lead to a detailed  
# approach to handling model and data uncertainty. Given that these challenging  
# aspects of model-data comparison are ignored in part (or in whole for model and  
# downscaling uncertainty),  
# I see no rationale for such detailed attention in this paper.

ATAT requires that geochronological data  
346 (advance or deglacial) are interpolated onto the same grid projection and  
resolution as the ice-sheet model  
347 before use. Though

# Samples for cosmogenic dating in glacial geology contexts are  
# generally gathered in non-singular quantities for a given local (given  
# all the uncertainties with inheritance). Consider a grid cell with  
# two  $^{10}\text{Be}$  samples that have very little overlap in their age PDFs. This  
# cannot be represented by a single Gaussian PDF, so I don't see how  
# this interpolated single age approach can work for this context  
# unless non-Gaussian PDF's are permitted (for which there is no indication).

Preparation of the geochronological data to be the same format and grid resolution  
as the ice sheet model output  
352 requires use of a GIS software package such as ESRI ArcMap or QGIS. Users must  
define deglacial/advance  
353 ages based either upon the availability of geochronological data in a cell, or  
based upon an empirical  
354 reconstruction (Figure 4). Where there are no data (i.e. outside the ice-sheet  
limit), the grid value must be kept at  
355 0. Given that this may involve many expert decisions (e.g. which date has the  
relevant stratigraphic setting,  
356 which date(s) are most reliable?), this part of the process is not yet  
automated within ATAT.

For a deglacial  
367 scenario, a model prediction will be unacceptable if the cell is ice-covered  
after the range of the date error is  
368 accounted for, but the cell may become deglaciaded any time before this.

# what range? one or two or 3 sigma? What if non-Gaussian?

The opposite is true for advance ages; ice can cover a cell any time after the date

and

371 associated error, but cannot cover the cell before the date of the advance.

# Does this take into account age uncertainty? If so, again to what  
# sigma before rejection?

To

373 account for the uneven spatial distribution of dates, a weighting for each date  
is then calculated based upon their  
374 spatial proximity. This weighting is used later when comparing the data to the  
model output. To calculate this  
375 weighting, the Euclidian distance from each dated cell to its nearest dated  
cell ( $d_i$ ) is calculated. The mean  
376 distance between dated cells ( $d_{bar}$ ) is then calculated, and the weight of each  
location ( $w_i$ ) defined using Eq. (1):

$w_i = \sqrt{d_i / d_{bar}}$

# I don't follow the logic of the weighting scheme. Why should the  
# weight be proportional  $d_i$ ? What if you have 2 equidistant adjacent  
# cells with dates? Your weighting scheme assigns the same weight to a  
# dated grid cell with one adjacent dated grid cell and a dated grid  
# cell surrounded by equi-distant dated grid cells.

387 geochronological age and modelled age at each location (Figure 4). Firstly, the  
grid cells which have data are  
388 categorised as to whether there is model-data agreement, based on the criteria  
shown in Figure 3. Since all

# If I follow this correctly, the algorithm is outputting a binary agree-disagree  
result.  
# If so, this should be changed to give a continuous metric (that can saturate to a  
large disagree  
# result when disagreement is well beyond 3 sigma data + downscaling + some model  
uncertainty.  
# Continuous metrics are required for efficient sampling/calibration algorithms.  
You  
# will likely start with a bunch of "bad" models, and you need to be able to  
decipher  
# which are less bad. If my interpretation of the metric is incorrect, then the  
# description needs to be improved.

Since all

389 dating techniques only record the absence of ice, geochronological data  
provides only a one-way constraint on  
390 palaeo-ice sheet activity. For deglacial ages, deglaciation could occur any  
time before the geochronological data  
391 provided and within the error of the date, but deglaciation must not occur  
after the error of the date is considered  
392 (Figure 3). For advance ages, advance must have happened after the date or  
within error beforehand, but palaeo393  
ice sheet advance cannot occur in the time period before that dated error (Figure  
3).

Therefore, ATAT also determines the temporal proximity of the geochronological data  
and the model  
406 prediction. Firstly, a map of the difference between modelled and empirical  
ages is created (Figure 5).

```
# Equations 2 and 3 don't take into account dating uncertainty, and
# are therefore inappropriate.
```

```
# The comparison should also take into account elevation. If the
# modelled contemporaneous ice surface is below the elevation of the
# dated sample, then there is datapoint-model consistency even though
# ice is present contrary to what the presented algorithm would
# indicate. Given the coarse topography near the present-day margin of
# Greenland, for instance, elevation needs to be accounted for.
```

```
# The algorithm also lacks consideration of subgrid/downscaling issues. Eg, for an
# ice marginal gridcell on a 25km grid, one would infer the actual
# subgrid margin to be somewhere within the gridcell since the next
# beyond margin gridcell has 0 mean ice thickness, and therefore 0 ice
# throughout. The easiest way to address this is to have a metric that
# takes into account proximity of the ice margin as well. This spatial
# proximity accounting is also important for model calibration to
# extract a continuous measure that can differentiate between two
# "bad" models.
```

different uses. For instance, the percentage of covered dates may prove useful as a first 421 filter of model runs, 422 whilst the wRMSE of dates within error may be more convenient for choosing between filtered model runs

```
# So by this logic, a model that was within 1 sigma of all but 2 data points and in
the rejection
# region for those 2 datapoints (lets say out of 1000 datapoints) would be worse
than a model
# that was only within 2 sigma everywhere with no data-points in the temporal
rejection region.
# ????
```

## 6.1. General Instructions

```
# I would recommend inclusion of an in-line documented sample run
# script (ie that could be executed with a single command). Model
# data comparison in generally involve large ensembles, so a script
# that could be run in a loop would make this more accessible to
# users.
```

```
# The design of the comparison output needs more thought for use
# in ensemble comparisons. A summary file should be generated that
# for each line starts with a model run ID and then includes the
# summary metric values for that run. The tool should come with
# an looping script to cycle over model runs from some file list.
```

```
#####
# small corrections
```

A very large source of uncertainty for modelling palaeo-ice sheets is the climate used .. few palaeo-ice sheet models are coupled with 202 climate models  
# should mention even state-of-the-art GCMs still have relatively  
# large uncertainties for this context (just need to consider the spread across PMIP 3 submissions)

490 agreement occurs, the RMSE produced are much higher when for the model is  
compared to the DATED  
491 reconstruction.  
# English is broken

Note that a fuller ensemble model of hundreds  
509 to thousands of runs is required for full model evaluation (e.g. Hubbard et  
al., 2009).  
# -> of thousands to potentially much more is required...  
# There is no way the uncertainties in a paleo cycle ice sheet model can be  
# honestly represented by even a thousand model runs if one is claiming "full model  
evaluation"
